# Supplementary material for: Fighting Pseudomonas aeruginosa Infections: Antibacterial and Antibiofilm Activity of D-Q53 CecB, a Synthetic Analog of a Silkworm Natural Cecropin B Variant
Source: MDPI journal article supplement (doi:10.3390/ijms241512496), 2023-08-06
Supplement: s1 [file s1]

# Fighting *Pseudomonas aeruginosa* Infections: Antibacterial and Antibiofilm Activity of D-Q53 CecB, a Synthetic Analog of a Silkworm Natural Cecropin B Variant

Irene Varponi <sup>1</sup>, Stefania Ferro <sup>2</sup>, Luca Menilli <sup>1</sup>, Alessandro Grapputo <sup>1,3</sup>, Francesca Moret <sup>1</sup>,  
Francesca Mastrotto <sup>4</sup>, Oriano Marin <sup>2</sup> and Federica Sandrelli <sup>1,\*</sup>

<sup>1</sup> Department of Biology, University of Padova, via U. Bassi 58/B, 35131 Padova, Italy

<sup>2</sup> Department of Biomedical Sciences, University of Padova, via U. Bassi 58/B, 35131 Padova, Italy

<sup>3</sup> National Biodiversity Future Centre, Piazza Marina 61, 90133 Palermo, Italy

<sup>4</sup> Department of Pharmaceutical and Pharmacological Sciences, University of Padova, via F. Marzolo 5, 35131 Padova, Italy

\* Correspondence: federica.sandrelli@unipd.it; Tel.: +39-049-8276216

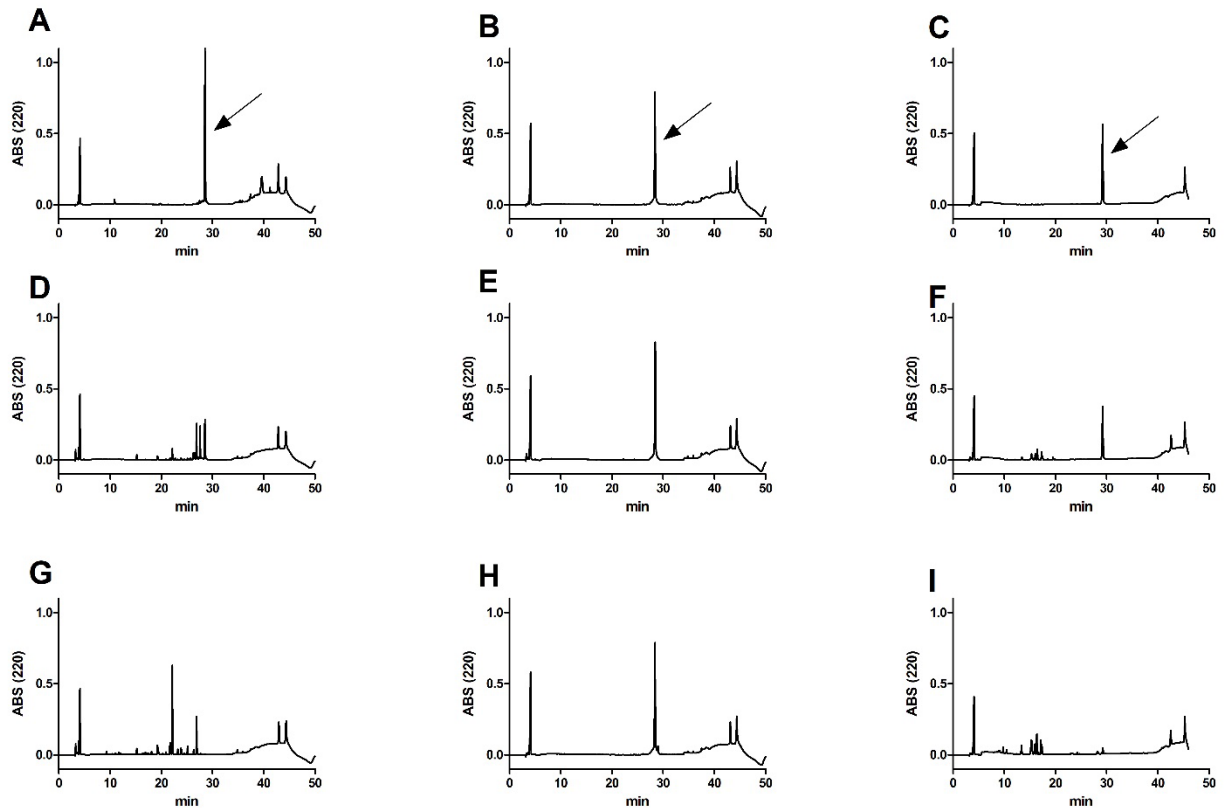

**Supplementary Figure S1.** Proteolytic activity of human neutrophil elastase on L-Q53 CecB, D-Q53 CecB and LL-37 peptides. RP-HPLC profiles of peptides after 0 min (**A, B, C**), 60 min (**D, E, F**) and 300 min (**G, H, I**) of incubation with the proteolytic enzyme. In **A, B, and C** arrows indicate the peaks of the intact peptides at their respective retention time.

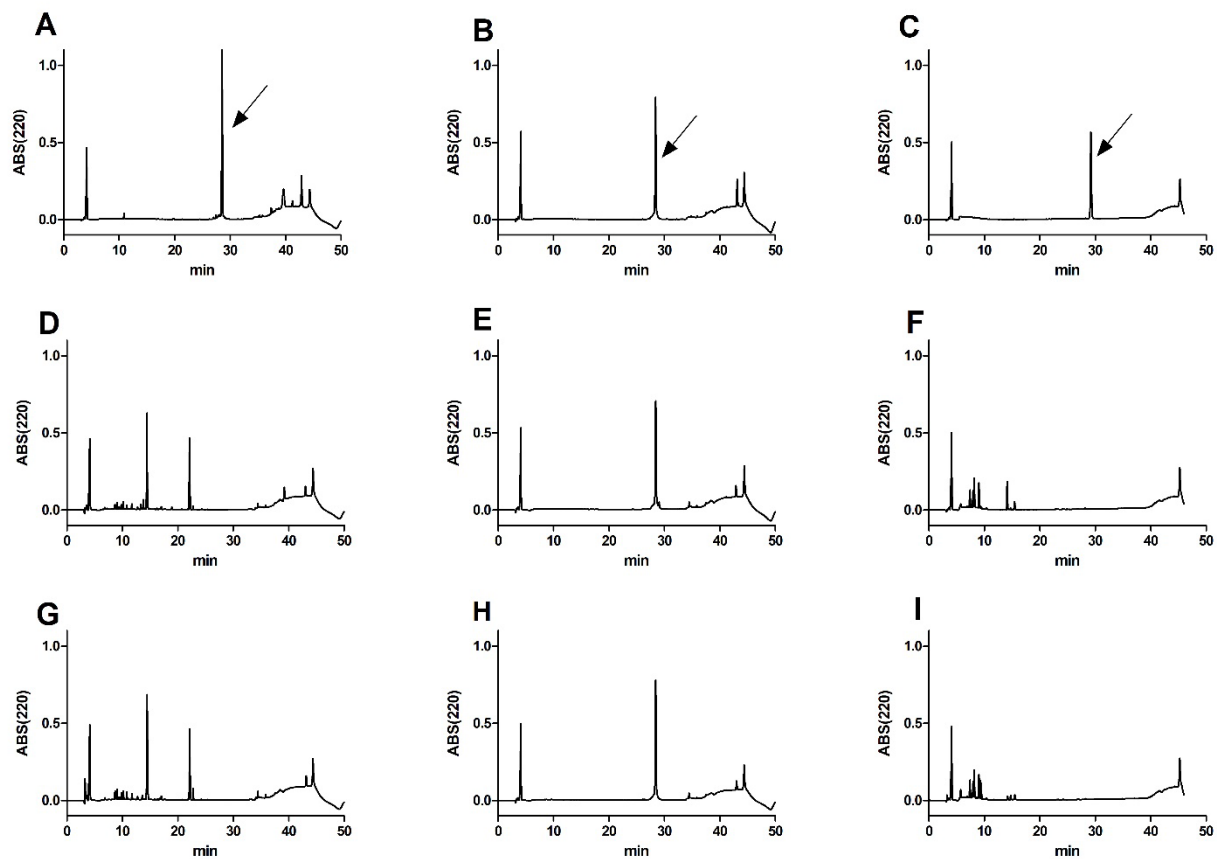

**Supplementary Figure S2.** Proteolytic activity of *P. aeruginosa* elastase on L-Q53 CecB, D-Q53 CecB and LL-37 peptides. RP-HPLC profiles of peptides after 0 min (**A**, **B**, **C**), 60 min (**D**, **E**, **F**) and 300 min (**G**, **E**, **H**) of incubation with the proteolytic enzyme. In **A**, **B**, and **C** arrows indicate the peaks of the intact peptides at their respective retention time.

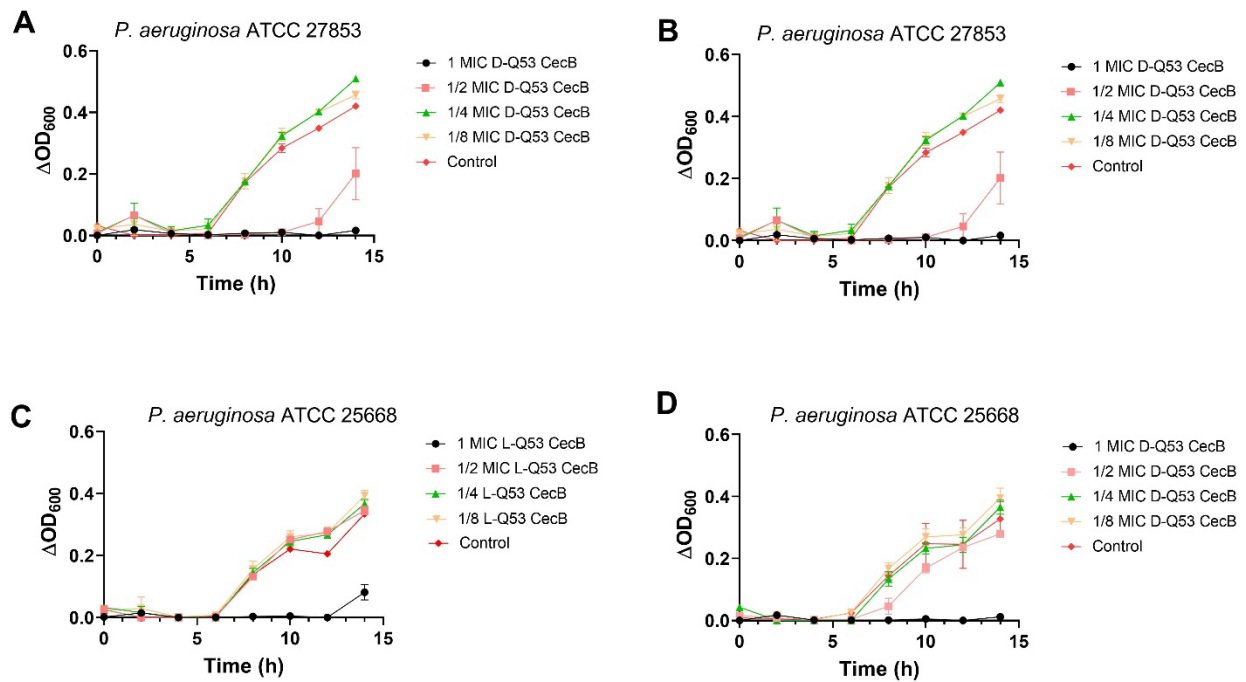

**Supplementary Figure S3.** Growth curves of *P. aeruginosa* treated with of L-Q53 CecB and D-Q53 CecB peptides at sub-MIC concentrations. ATCC 27853 strain treated with (A) L-Q53 CecB and (B) D-Q53 CecB. ATCC 25668 strain treated with (C) L-Q53 CecB and (D) D-Q53 CecB. Bacteria treated with 1 MIC L- or D- Q53 CecB peptides and untreated bacteria represent positive and negative controls, respectively. One-way ANOVA followed by *post-hoc* Dunnett's tests revealed no significant differences in (A and C) for the comparison between 1/2 MIC (1.1  $\mu$ M) L-Q53 CecB treated samples and negative controls, and in (B and D) for the comparison between 1/4 MIC (0.55  $\mu$ M) D-Q53 CecB treated samples and negative controls [ATCC 27853: (A)  $F_{4,10} = 257.8$ ,  $p < 0.0001$ ; 1/2 MIC L-Q53 CecB vs negative controls: Dunnett's test  $p > 0.05$ , ns; (B)  $F_{4,10} = 256.9$ ,  $p < 0.0001$ ; 1/4 MIC D-Q53 CecB vs negative controls: Dunnett's test  $p > 0.05$ , ns; ATCC 25668: (C)  $F_{4,10} = 171.6$ ,  $p < 0.0001$ ; 1/2 MIC L-Q53 CecB vs negative controls: Dunnett's test  $p > 0.05$ , ns; (D)  $F_{4,10} = 43.58$ ,  $p < 0.0001$ ; 1/4 MIC D-Q53 CecB vs negative controls: Dunnett's test  $p > 0.05$ , ns].

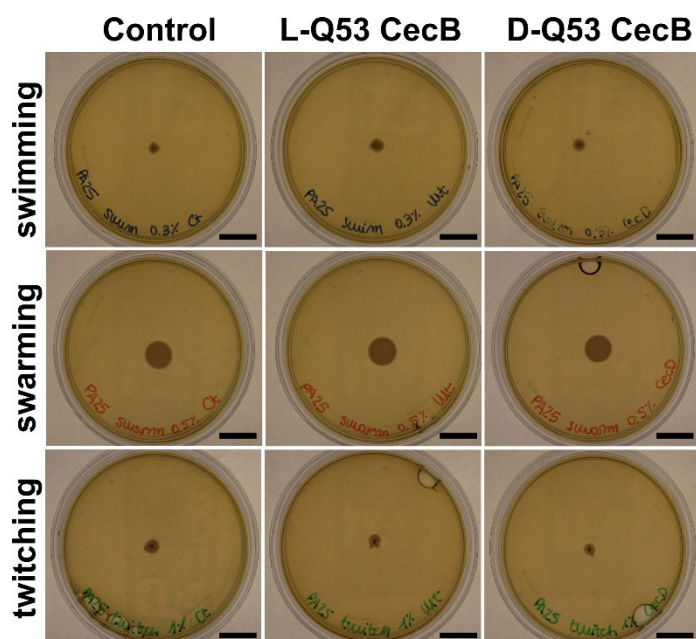

**Supplementary Figure S4.** Representative images of swimming, swarming and twitching motilities of *P. aeruginosa* ATCC 25668 strain in the presence of L-Q53 CecB (L-Q53), D-Q53 CecB (D-Q53), and untreated controls, after 48 h at 30 °C (swimming and swarming) and 37 °C (twitching). Bars represent 1 cm.
