# Supplementary material for: Fighting Pseudomonas aeruginosa Infections: Antibacterial and Antibiofilm Activity of D-Q53 CecB, a Synthetic Analog of a Silkworm Natural Cecropin B Variant
Source: MDPI journal article supplement (doi:10.3390/ijms241512496), 2023-08-06
Supplement: s1 [file s1]

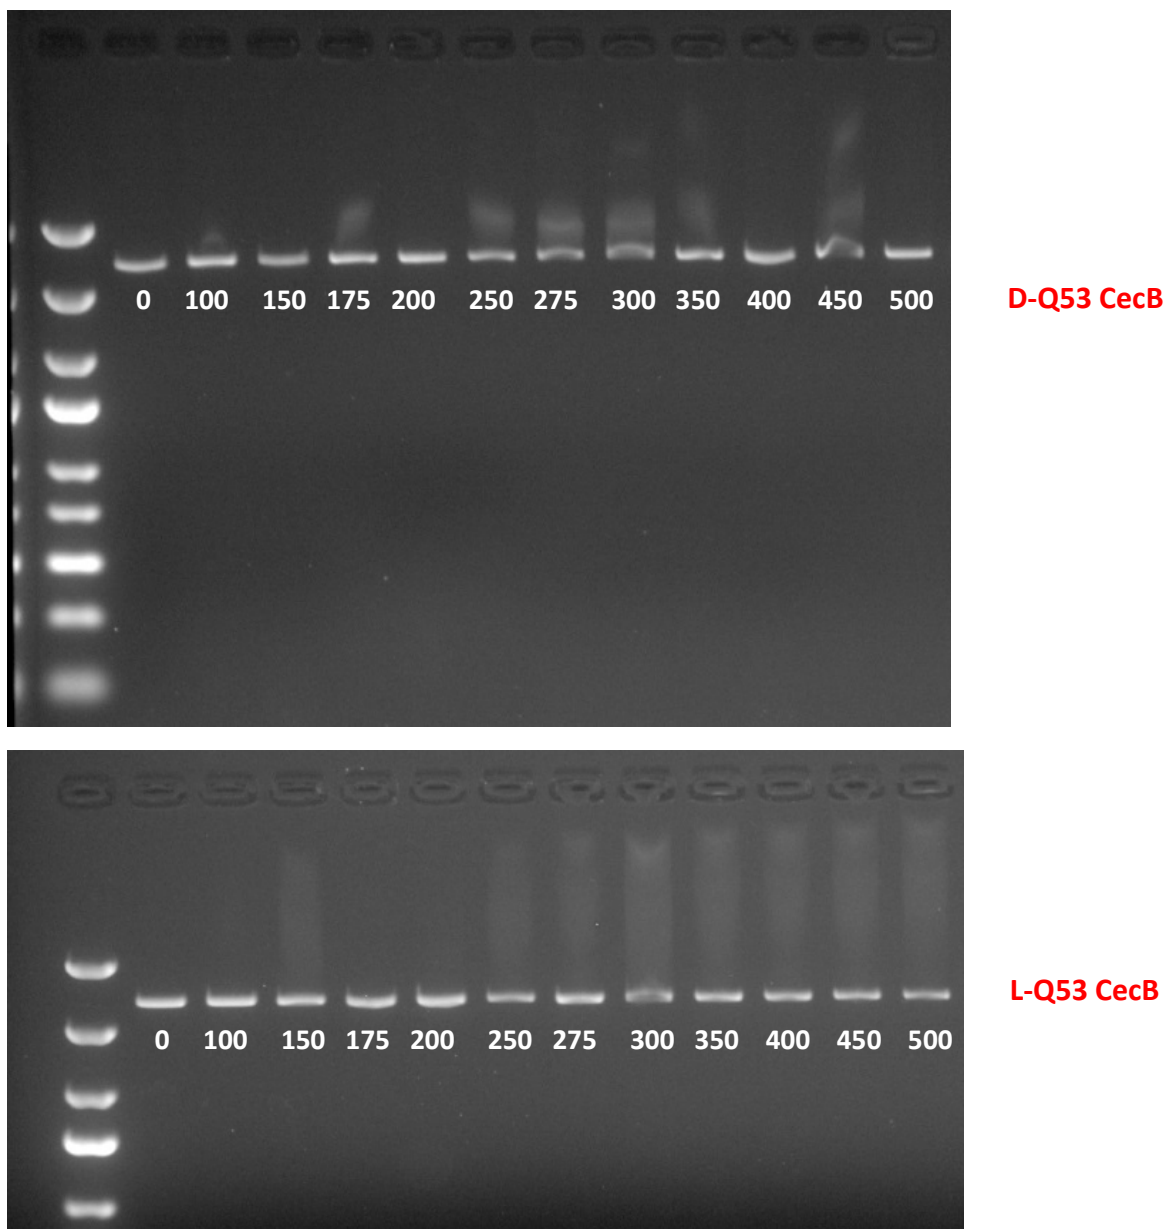

**Figure S5.** Interaction between increasing amounts of L- or D-Q53 CecB peptides and 100 ng of linearized DNA. Gel images of the first experiment; Amounts of peptides (ng) are reported in white.

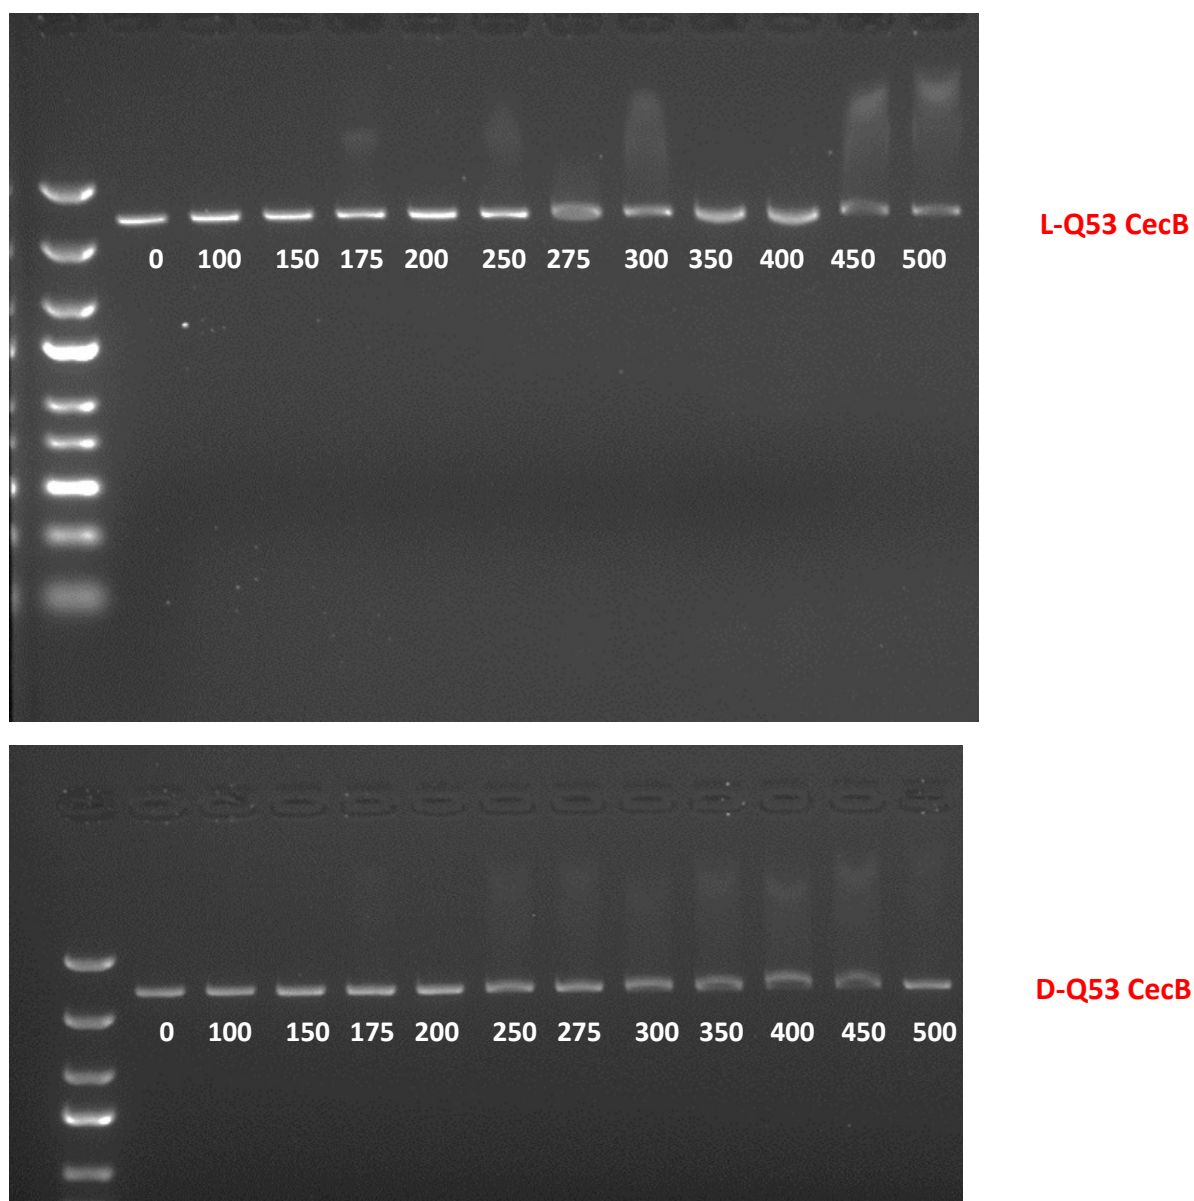

**Figure S6.** Interaction between increasing amounts of L- or D-Q53 CecB peptides and 100 ng of linearized DNA. Gel images of the second experiment; Amounts of peptides (ng) are reported in white.

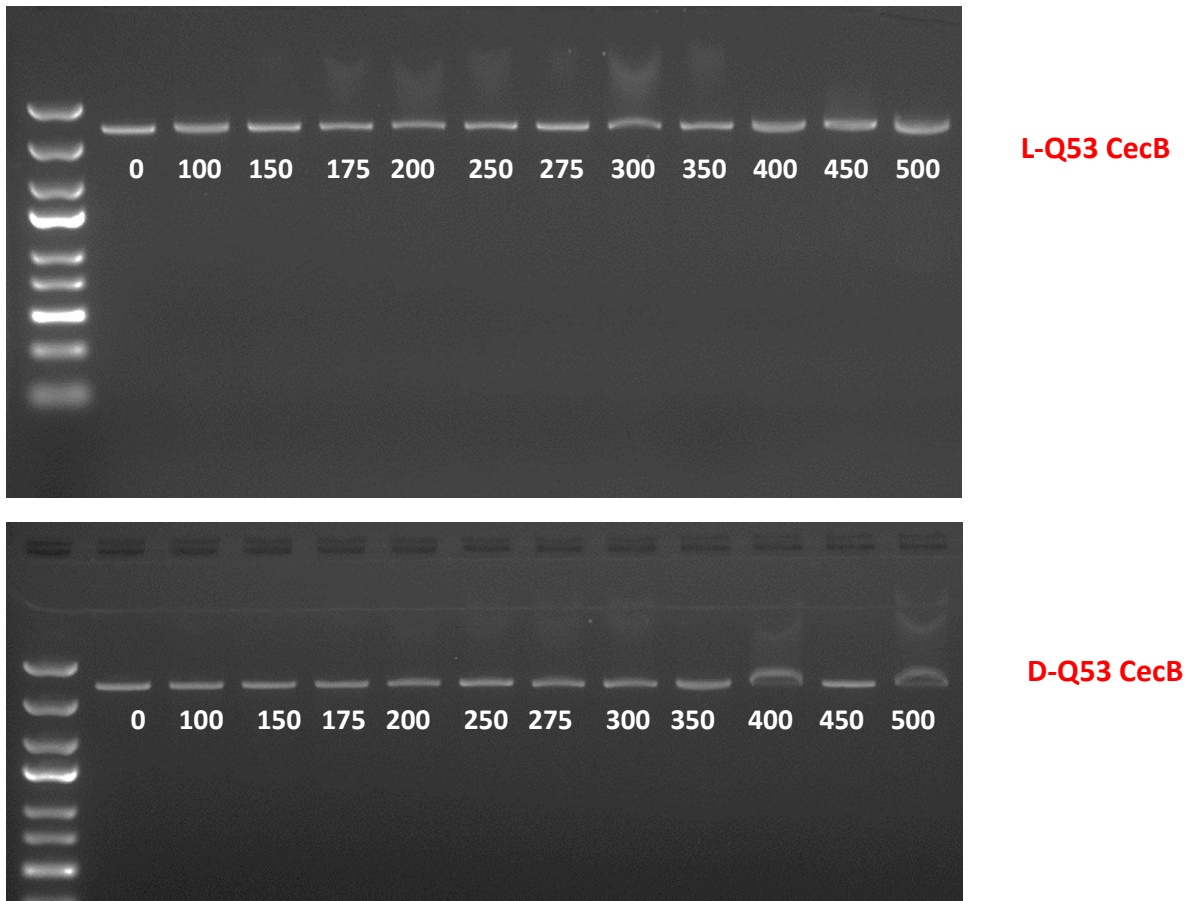

**Figure S7.** Interaction between increasing amounts of L- or D-Q53 CecB peptides and 100 ng of linearized DNA. Gel images of the third experiment; Amounts of peptides (ng) are reported in white.
